# Supplementary material for: Effect of β-cyclodextrin on the chemistry of 3′,4′,7-trihydroxyflavylium
Source: Royal Society of Chemistry journal article supplement (doi:10.1039/c3nj00588g), 2013-01-01

## Effect of $\beta$ -cyclodextrin in the chemistry of 3',4',7-trihydroxyflavylium

Nuno Basílio,<sup>(a)</sup> Ana Fernandes,<sup>(b)</sup> Victor de Freitas,<sup>(b)\*</sup> Sandra Gago,<sup>(a)</sup> Fernando Pina<sup>(a)\*</sup>

*a) REQUIMTE, Departamento de Química, Faculdade de Ciências e Tecnologia, Universidade Nova de Lisboa, 2829-516 Monte de Caparica, Portugal*

*b) Centro de Investigação em Química (CIQ), Departamento de Química, Faculdade de Ciências, Universidade do Porto, Rua do Campo Alegre, 687, 4169-007 Porto, Portugal*

Demonstration of eq.(1) of the manuscript

The flavylium cation is stable only at very acidic pH values. Raising the pH a sequence of chemical reactions take place as follows:

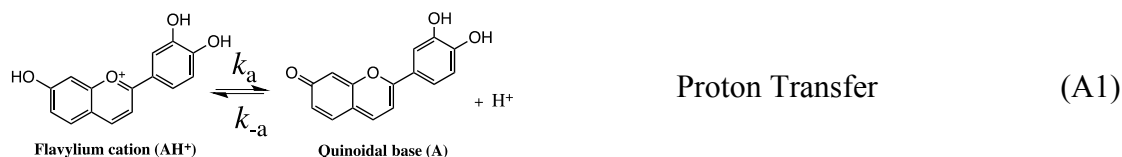

The quinoidal base is formed by proton transfer, eq.(A1). This reaction is by far the fast of the network.

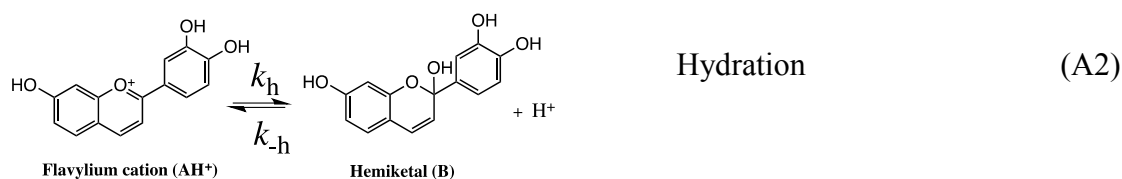

In competition with eq.(A1) the flavylium cation can hydrate in position 2 to give the hemiketal, eq.(A2). On the other hand, the hemiketal leads to the *cis*-chalcone upon opening of the ring, by a tautomeric process, eq.(A3)

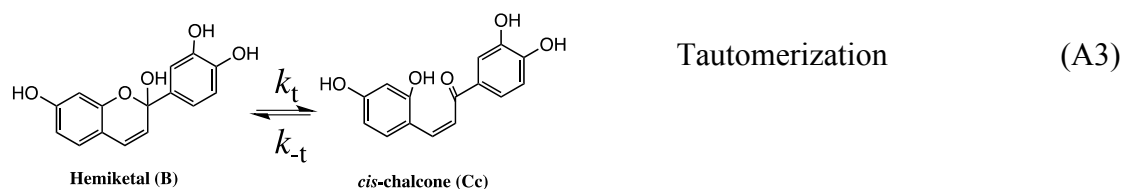

Finally, the *trans*-chalcone is formed from the isomerization of the *cis*-chalcone, eq.(A4)

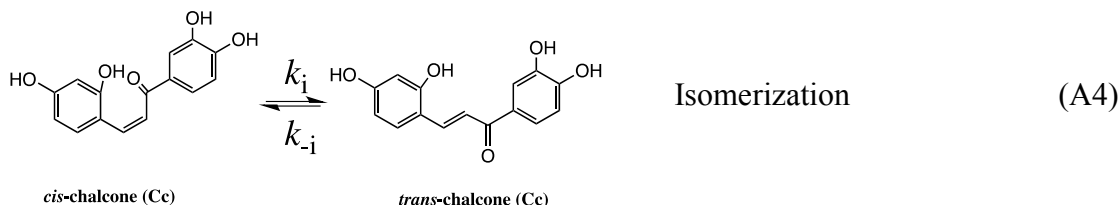

In eqs.(A1) to (A4) the equilibrium constants are defined by  $K_n = \frac{k_n}{k_{-n}}$   $n = a, t, i$

The mass balance gives in acid to moderately acid solutions is given by eq.(A5)

$$C_0 = [AH^+] + [A] + [B] + [Cc] + [Ct] = [AH^+] + [CB] \quad (A5)$$

$$\text{Where } [CB] = [A] + [B] + [Cc] + [Ct]$$

Using eqs.(A1) to (A4)

$$C_0 = [AH^+] + \frac{K_a}{[H^+]}[AH^+] + \frac{K_h}{[H^+]}[AH^+] + \frac{K_h K_t}{[H^+]}[AH^+] + \frac{K_h K_t K_i}{[H^+]}[AH^+] \quad (A6)$$

$$\text{Defining } K'_a = K_a + K_h + K_h K_t + K_h K_t K_i \quad (A7)$$

$$C_0 = [AH^+] \left( 1 + \frac{K'_a}{[H^+]} \right) \quad (A8)$$

Defining the mole fraction of the flavylum cation

$$X_{AH^+} = \frac{[AH^+]}{C_0} = \frac{[H^+]}{[H^+] + K'_a} \quad (A9)$$

and the mole fraction of the remaining species

$$X_{CB} = \frac{K'_a}{[H^+] + K'_a}$$

This is equivalent to a single acid base equilibrium between  $AH^+$  and a “base” CB

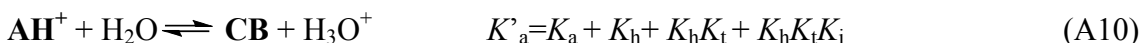

Supplement: c3nj00588g.pdf [file c3nj00588g.pdf]
